1 **Divergent physiological responses in laboratory rats and mice raised at high**  
2 **altitude.**

3  
4 Alexandra Jochmans-Lemoine<sup>1</sup>, Gabriella Villalpando<sup>2</sup>, Marcelino Gonzales<sup>2</sup>, Ibana  
5 Valverde<sup>2</sup>, Rudy Soria<sup>2</sup>, Vincent Joseph<sup>1</sup>.

6  
7 <sup>1</sup> Centre de Recherche du CHU de Québec, and Université Laval, Quebec, QC, Canada.

8 <sup>2</sup> Instituto Boliviano de Biología de Altura, and Universidad Mayor de San Andrés, La Paz,  
9 Bolivia.

10  
11 **Running title :** Physiology of HA rats and mice

12 **Corresponding author :**

13 Dr. Vincent Joseph

14 Centre de Recherche du CHU de Québec

15 Hôpital St-François d'Assise

16 10 rue de l'Espinay, Québec, QC, G1L 3L5

17 Tel: (418) 525-4444 ext. 52371

18 E-mail: Joseph.Vincent@crsfa.ulaval.ca

19

20

21

22 **ABSTRACT**

23 Ecological studies show that mice can be found at high altitude (HA - up to 4,000 m) while  
24 rats are absent at these altitudes, and there is no data to explain this discrepancy. We used  
25 adult laboratory rats and mice that have been raised for more than 30 generations in La  
26 Paz, Bolivia (3,600 m) and compared their hematocrit levels, right ventricular hypertrophy  
27 (index of pulmonary hypertension), and alveolar surface in the lungs. We also used whole  
28 body plethysmography, indirect calorimetry, and pulse oxymetry to measure ventilation,  
29 metabolic rate ( $O_2$  consumption and  $CO_2$  production), heart rate and pulse oxymetry oxygen  
30 saturation ( $SpO_2$ ) under ambient conditions, in response to exposure to sea level  $PO_2$  (32%  
31  $O_2 = 160$  mmHg - 10 minutes), and hypoxia (18 and 15%  $O_2 = 90$  and 75 mmHg – 10 minute  
32 each). The variables used for comparisons between species were corrected for body mass  
33 using standard allometric equations, and are termed mass-corrected variables. Under  
34 baseline, compared to rats, adult mice had similar levels of  $SpO_2$ , but lower hematocrit and  
35 hemoglobin levels, reduced right ventricular hypertrophy, and higher mass-corrected  
36 alveolar surface, tidal volume and metabolic rate. In response to sea level  $PO_2$  and hypoxia,  
37 mice and rats had similar changes of ventilation, but metabolic rate decreased much more  
38 in hypoxia in mice, while  $SpO_2$  remained higher in mice. We conclude that laboratory mice  
39 and rats that have been raised at HA for > 30 generations have different physiological  
40 responses to altitude. These differences might explain the different altitude distribution  
41 observed in wild rats and mice.

42

## INTRODUCTION

Physiological changes at high altitude are required to optimize the diffusion, transport, and cellular utilization of oxygen and counteract the ambient low pressure of oxygen ( $PO_2$ ). In endemic species that have been living for millions of years at altitude, physiological adaptations are thought to be linked to genetic selection, and are mostly characterized by a low or absent pulmonary hypertension (Tucker and Rhodes, 2001), elevated affinity of hemoglobin for  $O_2$  (Storz et al., 2010a; Storz et al., 2009), higher density of micro-vessels and mitochondria surface in the heart (Qi et al., 2008), left-ventricle hypertrophy that could lead to increased stroke volume (Pichon et al., 2013), and hematocrit level that remains within the sea-level range (Monge and Leon-Velarde, 1991; Storz et al., 2010b). Contrastingly, some species originating from sea level have exaggerated hematocrit level, drastic pulmonary hypertension, or hypertrophy of the heart when exposed to high altitude (Tucker and Rhodes, 2001), illustrating the fact that these species might have a genetic predisposition that would interfere with survival at high altitude, and present a “genetic barrier” for colonization of high altitude regions.

Interestingly, ecological reports from South America and New Zealand indicate that mice (*Mus musculus*) are present up to 4,000 m of altitude (Storz et al., 2007), while rats (*Rattus norvegicus*) are notably absent at high altitude (Anderson, 1997; Innes, 2005). In these two regions, rats and mice have been introduced over the last eight to five centuries by human migrations (Wilmshurst et al., 2008, see also Storz et al., 2007), accordingly, comparative studies between rats and mice might be useful to further understand the physiological responses at altitude in species that are not “high altitude native”, but might nonetheless have different success for life at altitude.

Over the past 20 years, we have been able to raise laboratory rats (Sprague-Dawley) for more than 30 generations, in laboratory conditions at an altitude of 3,600 m above sea level, in La Paz, Bolivia. These animals present an elevated hematocrit and hemoglobin levels, a right ventricular hypertrophy (sign of pulmonary hypertension), an altered alveolar structure with enlarged airspaces in the lungs, and impaired respiratory control (Lumbroso et al., 2012). Considering that an elevated hematocrit and pulmonary hypertension impair survival and lead to right heart failure (Lumbroso et al., 2012; Naeije

73 and Manes, 2014; Storz et al., 2010b), this might explain why rats have not been able to  
74 establish stable colonies in high altitude regions under natural conditions.

75 In the present study we asked whether laboratory mice with a similar history of life at high  
76 altitude have different physiological responses than rats. To this aim we compared arterial  
77 oxygen saturation, hematological, cardiac, ventilatory, metabolic, and lungs characteristics  
78 in adult mice and rats that have been born and raised at an altitude of 3,600 m (La Paz,  
79 Bolivia) since 1992. The study has been performed in males and females to address  
80 whether sex-specific physiological differences would be present in mice and rats at high  
81 altitude.

82

83

## 84 **RESULTS**

85

### 86 **Physiological parameters, hematology, and lung architecture in high altitude rats and** 87 **mice.**

88 *Arterial oxygen saturation, heart rate, and hematology.*

89 Under baseline conditions, rats and mice had SpO<sub>2</sub> values around 80%, without significant  
90 effect of species or sex (Fig. 1A). Mice had a lower right ventricular hypertrophy compared  
91 to rats (P for species <0.0001, Fig. 1B). Heart rate was higher in mice compared to rats (P  
92 value for species <0.0001, Fig. 1C), but when the difference in body weight was taken into  
93 account by applying the allometric scaling factor (heart rate in bpm / weight in g<sup>-0.25</sup> – see  
94 material and method), mice had lower mass-corrected heart rate compared to rats (P for  
95 species <0.0001, Fig. 1D), and female rats had lower mass-corrected heart rate than male  
96 rats (Fig. 1D).

97 Compared to rats, high altitude mice showed lower hemoglobin concentration (P for  
98 species <0.0001, Fig. 1E), and hematocrit (P for species <0.0001 Fig. 1F) values.  
99 Interestingly, the hemoglobin value in mice was below the normal range of the sea-level  
100 value (see table 1) while hematocrit was slightly higher than the normal sea-level range  
101 (table 1). In rats, both hematocrit and hemoglobin values were above the normal sea level  
102 range (table 1). Compared to males, females of both species had lower hematocrit (P for sex  
103 <0.0001, Fig. 1E), and female rats had lower hemoglobin values than male rats (Fig. 1F).

104

105 *Minute ventilation, Tidal volume, and Respiratory Frequency.*

106 Compared to rats, mice have higher mass-specific minute ventilation, tidal volume, and  
107 respiratory frequency (P for species <0.0001, Fig. 2 A-C). Female mice have higher mass-  
108 specific minute ventilation (P for sex = 0.04) and tidal volume (P for sex = 0.04) than male  
109 mice (Fig. 2 A-B). When corrected for body mass using standard allometric corrections,  
110 there was a significant effect of species (P<0.0001) and sex (P=0.04) for minute ventilation:  
111 male mice had similar mass-corrected minute ventilation and respiratory frequency than  
112 male rats, but higher mass-corrected tidal volume (Fig. 2D-F). Female mice had higher  
113 mass-corrected minute ventilation and tidal volume compared to male mice (Fig. 2D-E).  
114 Mass-corrected respiratory frequency was lower in female rats compared to male rats (Fig.  
115 2F), but there was no significant effect of species.

116

117 *Metabolic rate, respiratory exchange ratio, and rectal temperature.*

118 Compared to rats, mice had higher mass-specific (Fig. 3A-B) or mass-corrected (Fig. 3C-D)  
119 O<sub>2</sub> consumption and CO<sub>2</sub> production (P<0.0001). The respiratory exchange ratio was higher  
120 in rats compared to mice (P for species <0,0002, Fig. 3E). Rectal temperature measured  
121 before the onset of respiratory and metabolic recordings was similar in rats (35.2 ± 0.2 °C)  
122 and mice (35.2 ± 0.2 °C). There was no effect of sex for metabolic variables.

123

124 *Lung volume, lung weight, and lung architecture.*

125 Compared to rats, mice have higher mass-specific lung volume and lung weight (P for  
126 species <0.0001, Fig. 4 A-B). Since for lung volume and lung weight, the allometric scaling  
127 parameter is 1 (see methods), mass-specific values allow direct comparison between  
128 species of different body weight. Representative lung images are presented in Fig. 5A (for  
129 rats) and Fig. 5B (for mice): note the enlarged air spaces in rats compared to mice. The  
130 mean linear intercept (Lm) was lower in mice compared to rats (P for species <0.0001, Fig.  
131 5C), which was reflected in higher mass-corrected relative and total alveolar surfaces in  
132 mice (P for species <0.0001, Fig. 5 C-D). There was no effect of sex for these variables.

133 Because alveolar surface is directly proportional to oxygen consumption (Tenney and  
134 Remmers, 1963), we also calculated the ratio of the total alveolar surface to the O<sub>2</sub>

135 consumption ( $\text{m}^2/\text{ml O}_2$  consumed in 1 minute). There was no significant effect of sex (P for  
136 sex = 0.58) or significant sex x species interaction. The mean value was higher in mice  
137 compared to rats (Fig. 6), and both values are higher than the expected sea level values  
138 (table 1).

139  
140 **Respiratory, metabolic and heart rate responses to changes in inspired  $\text{PO}_2$  in high**  
141 **altitude rats and mice.**

142 For the responses normalized to baseline values there was no significant effect of sex,  
143 accordingly males and females are pooled. At 12%  $\text{O}_2$  (corresponding to a  $\text{PiO}_2$  of 60 mmHg  
144 – see material and method), 4 rats (3 males and 1 female) had signs of distress, prolonged  
145 apneas, and gasps within the 1<sup>st</sup> minute of exposure. The experiments were therefore  
146 stopped and data recorded at 12% (for rats and mice) are not presented – with the  
147 exception of rectal temperature. All mice supported exposure to 12%  $\text{O}_2$  without signs of  
148 distress, apneas or gasps.

149  
150 *Arterial oxygen saturation and heart rate.*

151  $\text{SpO}_2$  was higher in mice compared to rats upon exposure to sea level  $\text{PiO}_2$  (32%  $\text{O}_2$ , Fig. 7A)  
152 and in moderate hypoxia (18%  $\text{O}_2$ , Fig. 7A). Heart rate declined in rats when exposed to sea  
153 level  $\text{PiO}_2$ , but remained unchanged upon hypoxic exposure (Fig 7B). In mice, heart rate  
154 remained unchanged when exposed to sea level  $\text{PiO}_2$ , slightly declined upon hypoxic  
155 exposure to 18%  $\text{O}_2$ , and returned to baseline levels at 15%  $\text{O}_2$  (Fig 7B).

156  
157 *Minute ventilation, tidal volume, respiratory frequency, and metabolic rate.*

158 Exposure to sea level  $\text{PiO}_2$  reduced minute ventilation to a similar extent in mice and rats  
159 (Fig. 8A), however rats had a more pronounced decline of tidal volume than mice (Fig. 8B),  
160 and contrastingly mice had a more important decline of respiratory frequency than rats  
161 (Fig. 8C). Under moderate hypoxia (18%) tidal volume was higher in mice compared to rats  
162 (the apparent drop at 18%  $\text{O}_2$  in rats is not significant compared to 21%  $\text{O}_2$ ).

163 In response to sea level  $\text{PiO}_2$ , there was no change of metabolic rate in either species (Fig.  
164 9), but upon hypoxic exposure metabolic rate decreased in mice but not in rats: at 15%  $\text{O}_2$ ,  
165  $\text{VO}_2$  and  $\text{VCO}_2$  had fallen by more than 30% in mice (Fig. 9A and 9B). Similarly, rectal

166 temperature fell by about 2°C in mice (from  $35.2 \pm 0.2$  °C to  $33.1 \pm 0.2$  °C), but remained  
167 unchanged in rats (Fig. 9C).

168 Under hypoxic conditions, rats did not increased minute ventilation and maintained their  
169 metabolic rate to the baseline level, while in mice metabolic rate fell during hypoxic  
170 exposure. To ask whether this pattern in rats is achieved by increasing O<sub>2</sub> extraction from  
171 pulmonary gas, we calculated the percentage of O<sub>2</sub> extraction ( $O_2$  consumption /  $V_e \times FiO_2$  -  
172 Fig. 10A and B). There was a significant effect of species for this parameter ( $P=0.05$ ) and a  
173 significant species x hypoxia interaction ( $P=0.0009$ ). In males rats, O<sub>2</sub> extraction increased  
174 in hypoxia (18 and 15% O<sub>2</sub>) compared to 32% O<sub>2</sub>, while it remained unchanged in male  
175 mice (Fig. 10A). Female mice had a lower O<sub>2</sub> extraction value in hypoxia than female rats  
176 (Fig. 10B), due to the fact that mass-specific ventilation (Fig 10C and 10D – ANOVA P value  
177 for sex = 0.002 : sex x species = 0.004) and tidal volume (not shown) is higher in female  
178 mice than male mice throughout the hypoxic exposure, while there is no effect of sex for  
179 mass-specific VO<sub>2</sub> (Fig. 10E and 10F).

180

181

## 182 DISCUSSION

183 We compared physiological responses in laboratory rats and mice that have been raised at  
184 3,600 meters above sea level for about 30 generations. The key differences between these  
185 two species include higher erythrocytosis and elevated right ventricular hypertrophy (sign  
186 of higher pulmonary hypertension) in rats compared to mice, and lower mass-corrected  
187 lung volume, alveolar surface, tidal volume and O<sub>2</sub> consumption in rats compared to mice.  
188 However rats and mice have similar levels of SpO<sub>2</sub>.

189 The relevance of performing comparative studies between two species as an approach to  
190 understand adaptive processes to a given environmental condition has been questioned  
191 (Garland and Adolph, 1994). In line with the limitations of this approach, this study was not  
192 designed to draw conclusions on genetic adaptation to altitude, but rather illustrate  
193 physiological differences at altitude in two species that are known to have a different  
194 altitudinal range of distribution. As such, our results provide a relevant model of divergent  
195 physiological responses at high altitude, and might help to explain ecological reports

196 suggesting that mice are more easily found under natural conditions at high altitude than  
197 rats (Anderson, 1997; Innes, 2005; Storz et al., 2007).

198 To illustrate how rats and mice might differ in their responses to high altitude hypoxia, the  
199 table 1 presents a series of data obtained from the present high altitude study and from  
200 other studies at sea level, including some data obtained in our sea level laboratory in SD  
201 rats and FVB mice (all adult males of similar age than the high altitude animals).

202 One should however keep in mind that we have not been able to precisely determine the  
203 identity of the mouse species from the high altitude colony. However, as they are  
204 descendent from a provider of standard laboratory mice they should be *M. musculus*  
205 *domesticus* (Yang et al., 2011), but we cannot exclude that they have been hybridized with  
206 local species such as *M. musculus castaneus* which (with *M. musculus domesticus*) have been  
207 identified among wild-caught mice in La Paz (Storz et al., 2007). Nevertheless, it remains  
208 unclear from the literature if these groups of mice should be considered as distinct species  
209 or subspecies of *Mus musculus* (For a detailed discussion, see "Mus Musculus" entry in  
210 *Mammals Species of the World 2005*).

211  
212 **Right ventricular hypertrophy, excessive erythropoiesis and elevated heart rate are**  
213 **present in high altitude rats but not in mice.**

214 In mice the right-to-left ventricle ratio, an index of arterial pulmonary hypertension, was  
215 around 35%. While this is higher than values normally reported at sea level (around 20%  
216 (Ciuculan et al., 2011), it is much lower than the values reported in rats in our present and  
217 past (Lumbroso et al., 2012) studies. Protection against elevated pulmonary hypertension is  
218 common in species adapted to high altitude, which demonstrate thinner pulmonary vessel  
219 walls with reduced number of muscular cells (Tucker and Rhodes, 2001). We did not  
220 perform specific analysis of the arterial wall structure in mice, but it is likely that they  
221 would also present this typical characteristic.

222 There was also an important difference of hematocrit and hemoglobin values between rats  
223 and mice, and similar SpO<sub>2</sub> levels. The enhanced hematocrit value in rats might be due to a  
224 more sensitive hypoxia sensing system in the kidneys, which could include stabilization of  
225 the Hypoxic-Inducible-Factor (HIF), expression of HIF regulatory proteins, and/or synthesis  
226 of erythropoietin (Epo – (Franke et al., 2013). In addition, it is worth mentioning that the



227 synthesis of Epo in the kidney is regulated by the glomerular filtration rate (Olsen et al.,  
228 2011) because the consumption of O<sub>2</sub> in the kidneys (a major determinant of local PO<sub>2</sub>) is  
229 tightly dependent on sodium reabsorption and glomerular filtration rate (Donnelly, 2001).  
230 Accordingly, a lower glomerular filtration rate and/or sodium reabsorption in mice  
231 compared to rats could contribute to lower Epo production and reduced hematocrit.  
232 In male rats raised at altitude heart rate was around 500 bpm, whereas normal sea level  
233 values of heart rate are around 250-300 bpm during daytime, and 350-400 bpm during  
234 nighttime (Lemmer et al., 1993). However, it is not possible from our data to elucidate  
235 whether the elevated heart rate effectively increases cardiac output or compensates for a  
236 reduced stroke volume. By comparisons, while the heart rate reported in mice under  
237 baseline conditions (670 +/- 20 bpm in males) is higher than normal sea level values at rest  
238 (500-600 bpm daytime), it remains within the normal range of values recorded during the  
239 active phase (nighttime 600-700 bpm) (Sebastian et al., 2013).

240  
241 **Reduced metabolic rate and elevated respiratory exchange ratio in high altitude rats**  
242 **versus mice.**

243 Compared to mice, rats had a reduced O<sub>2</sub> consumption rate (either mass-specific or mass-  
244 corrected), which might help them to maintain SpO<sub>2</sub> value despite the reduced mass-  
245 corrected alveolar surface of the lungs. In several vertebrate species, reduced O<sub>2</sub>  
246 consumption rate is a key strategy of adaptation to hypoxia (Bickler and Buck, 2007).  
247 Subterranean species, such as naked mole rats that live in burrows under severe hypoxic  
248 conditions have mechanisms of tolerance to hypoxia including low metabolic rate and  
249 reduced core body temperature (Nathaniel et al., 2012). Accordingly, rats raised under  
250 chronic hypoxia for several generations might have developed cellular mechanisms to  
251 reduce O<sub>2</sub> consumption and therefore help maintains elevated values of arterial SpO<sub>2</sub>.  
252 However, it should be emphasized that in rats this strategy is apparently not successful and  
253 does not allow overcoming the drastic elevation of right ventricular hypertrophy and  
254 pulmonary hypertension.

255 Rats showed a higher respiratory exchange ratio ( $\dot{V}_{\text{CO}_2} / \dot{V}_{\text{O}_2}$ ) than mice. We previously  
256 reported elevated values in high altitude rats (Lumbroso et al., 2012). High values of the

257 respiratory exchange ratio indicate that energy production is mostly accomplished by  
258 oxidation of glucose molecules, which is an effective way to optimize synthesis of ATP  
259 under low oxygen availability (Hochachka and Somero, 2002) since glucose oxidation  
260 produces the highest ratio of ATP synthesized for each molecules of O<sub>2</sub> consumed compared  
261 to other metabolites. Interestingly, deer-mice (considered as being genetically adapted to  
262 altitude) maintain low values of  $\dot{V}_{\text{CO}_2} / \dot{V}_{\text{O}_2}$  and high levels of fatty acid oxidation under  
263 combined exposure to cold and hypoxic stress (Cheviron et al., 2012). This pattern probably  
264 helps to maintain elevated glycogen stores that can be used for bursts of intense exercise  
265 (“fight or flight” stress response). Since fatty acid oxidation requires more O<sub>2</sub> than glycolytic  
266 pathways, it should be supported by physiological adjustments of the O<sub>2</sub> transport system.

267  
268 **Reduced lung volume and alveolar exchange surface in high altitude rats versus mice.**

269 Compared to mice, rats had enlarged airspaces leading to lower mass-corrected relative  
270 alveolar exchange surface. Combined with a reduced mass-corrected lung volume this leads  
271 to a drastic difference of the estimated mass-corrected total lung exchange surface between  
272 rats and mice. In mammals - with a range of body weight from 10 g (bat) to > 1000 kg  
273 (whale) - lung alveolar surface in m<sup>2</sup> is directly proportional to O<sub>2</sub> consumption in ml/min,  
274 with a scaling variable of 1 (Tenney and Remmers, 1963). Therefore the ratio of alveolar  
275 surface to O<sub>2</sub> consumption should be similar between 2 species, which is not the case when  
276 comparing rats and mice at altitude (cf. Fig 6). However, if we compare the values obtained  
277 at high altitude with an estimation of expected sea level values (see table 1), it is clear that,  
278 relatively to O<sub>2</sub> consumption, the total alveolar surface is enhanced in rats and mice living at  
279 HA. Yet, while in mice this was achieved by increasing the volume of the lungs and the total  
280 alveolar surface, in rats this is possible only because O<sub>2</sub> consumption rate is much lower at  
281 HA than at sea level. This striking difference might be due to an ability of the lungs of mice  
282 to respond to hypoxia by increasing the gas exchange surface, while these responses would  
283 not be present in rats, which therefore have reached a fragile equilibrium at altitude by  
284 reducing O<sub>2</sub> consumption rate. Of note, in high altitude rats compared to sea level rats (see  
285 table 1) there is an increase in the mass of the lungs but not in the volume, it is likely the  
286 consequence of neo-angiogenesis and hypertrophy of lung vessels.

287

288 **Respiratory and metabolic responses to hypoxia in high altitude rats and mice.**

289 Chemoreflex function helps maintaining adequate ventilation under chronic hypoxia, and is  
290 an important contributor to efficient adaptation to hypoxia (Dempsey et al., 2014; Joseph  
291 and Pequignot, 2009). At high altitude, a relevant approach to evaluate the basal activity of  
292 the peripheral chemoreceptors is to relieve the chronic hypoxic stimulus, which in the  
293 present study is achieved by exposure to sea level PO<sub>2</sub>. Rats and mice had similar decrease  
294 of minute ventilation in response to sea level PO<sub>2</sub> suggesting similar sensibility of  
295 peripheral chemoreceptors to hypoxia, but this was achieved by a different pattern of  
296 response with a higher decrease of respiratory frequency being observed in mice compared  
297 to rats, and a decrease of tidal volume in rats but not in mice. This is a striking difference if  
298 we take into account that under baseline conditions the tidal volume of rats (either mass-  
299 specific or mass-corrected) is already smaller compared to mice. Hence, the chemoreflex  
300 drive in rats increases the tidal volume, which probably helps to maintain an elevated SpO<sub>2</sub>  
301 by optimizing ventilation of the lungs. Such differences between rats and mice probably rely  
302 on different neurochemical processes within the central respiratory pathways leading to  
303 differential translation of the peripheral chemoreceptors inputs into phrenic nerve activity.  
304 It is intriguing to report that HIF and HIF target genes appear to be key elements in the  
305 plasticity of the respiratory control system under chronic hypoxia (Kline et al., 2002;  
306 Pascual et al., 2001; Powell and Fu, 2008; Prabhakar and Semenza, 2012; Soliz et al., 2007),  
307 accordingly, species differences might be related to differential control of HIF or HIF-  
308 regulating proteins in rats compared to mice.

309

310 It is also noteworthy that mice are able to reduce metabolic rate and rectal temperature in  
311 response to hypoxia, while this response is not present in rats. This response is typically  
312 seen as being protective and contributes to preserve arterial oxygen pressure in hypoxia.  
313 This is an active process resulting from a reduction of the thermoregulatory set point,  
314 regulated within the preoptic hypothalamic nucleus (Barros et al., 2001; Steiner et al.,  
315 2002). It is possible to ask whether the drop in rectal temperature account for the fall in  
316 metabolic rate or if is there evidence of metabolic suppression beyond that due to a  
317 resetting of Tb set point (Barros et al., 2001). We used a web-based calculator

318 ([www.physiologyweb.com/calculators/q10\\_calculator.html](http://www.physiologyweb.com/calculators/q10_calculator.html)) and calculated that in mice  $O_2$   
319 consumption would drop from 5.82 to 4.62 ml/min/100g with a drop of rectal temperature  
320 from 35.2 to 33.1°C and a Q10 of 3. Since  $O_2$  consumption was below these values, there is  
321 indeed an evidence of a metabolic suppression beyond that due to a resetting of  $T_b$  set  
322 point. The excess metabolic suppression is 1.37 ml  $O_2$ /min/100g – almost 1/4th of the  
323 basal  $O_2$  consumption of mice. The fact that this response is present in mice but not in rats  
324 indicates that mice are able to display protective responses to counteract further reduction  
325 of  $O_2$  level, which is clearly another advantage at high altitude.

326  
327 The high heart rate observed in rats might also explain the fact that several rats were not  
328 able to withstand hypoxic exposure at 12%  $O_2$ . At the altitude of La Paz, this  $O_2$  levels  
329 corresponds to an inspired  $PO_2$  of 60 mmHg (or 7.8 %  $O_2$  in inspired air at sea level), a  
330 severe level of hypoxia that could be close to the minimum  $O_2$  level necessary to maintain  
331 the function of the heart under an already challenging condition.

332  
333 **Sex specific effects in high altitude rats and mice.**  
334 Females of both species showed lower hematocrit values than males, probably reflecting  
335 the inhibitory effect of estradiol on Epo synthesis (Mukundan et al., 2002). However, sex  
336 specific effects on respiratory parameters were mostly present in mice, with females mice  
337 showing higher tidal volume and minute ventilation than male mice (either mass-specific or  
338 mass-corrected data). In rats, females had lower mass-corrected respiratory frequency than  
339 males, but tidal volume and minute ventilation were similar (either for mass-specific or  
340 mass-corrected data). Higher values of minute ventilation and tidal volume in females  
341 compared to males likely reflect the respiratory stimulant effect of ovarian steroids (Joseph  
342 et al., 2002), and have been reported in our previous studies (Lumbroso et al., 2012). The  
343 fact that sex-specific effects were not reported in the present study in rats might be related  
344 to the reduced sample size (6 males, 6 females), while we compared 17 males to 16 females  
345 in the previous study (Lumbroso et al., 2012).

346  
347 We conclude that adult laboratory rats and mice that have been raised for a similar period  
348 of time under conditions of chronic hypoxia at high altitude display divergent physiological

349 responses. Interestingly, a previous genetic study showed that there is no adaptive  
350 modification of the haemoglobin function in wild *Mus musculus* caught in La Paz compared  
351 to other specimens at sea level (Lima, Peru) (Storz et al., 2007), therefore it is tempting to  
352 speculate that the physiological responses observed in mice that have been bred in La Paz  
353 might explain the ability of this species to successfully withstand the high altitude hypoxic  
354 environment.

355

356

## 357 MATERIAL AND METHODS

### 358 *Animals*

359 We used adult (2-3 months old) male and female rats (6 animals each sex) and mice (10  
360 animals each sex) from different breed. Mice were obtained from the Instituto Nacional de  
361 Laboratorios de Salud (INLASA, La Paz, Bolivia). These mice are descendent of a lineage of  
362 animals that have been originally imported from France (IFFA-CREDO) 20-25 years ago.  
363 Since the genetic background of the mice was not available, we performed a complete  
364 genetic analysis on a sample of DNA extracted from the lungs of an adult male mouse, by  
365 using the background characterization offered by Charles-River (St Constant, Québec,  
366 Canada). This analysis compares allele variations of 384 single-nucleotide-polymorphisms  
367 of the unknown DNA to the DNA of 40 common inbred and F1 hybrid strains. The analysis  
368 indicated that the mice scored as 73.11 % FVB, and that they are either a mix of FVB and 2  
369 other strains, or an outbred strain.

370 Rats are Sprague Dawley from the Instituto Boliviano de Biología de Altura (IBBA, La Paz,  
371 Bolivia). These animals have been originally imported from France (IFFA-CREDO) in 1992,  
372 and constantly bred at the IBBA (for the present study we used rats from the 30<sup>th</sup>  
373 generation).

374 Animals were housed under standard conditions, had access to food and water ad-libitum,  
375 and were exposed to a 12:12h light/dark cycle. Once transported from INLASA to the IBBA,  
376 mice were left undisturbed for 1 week before starting the experiments. All protocols have  
377 been reviewed and approved by the scientific committee of IBBA in Bolivia and are in  
378 concordance with the guidelines of the Canadian Council of Animal Care.

379

380 *Recording of ventilatory parameters, arterial oxygen saturation, and heart rate in*  
381 *unrestrained, unanesthetized rats and mice at high altitude.*

382 The animals were placed in a whole body, flow-through, plethysmograph chamber for mice  
383 or rats (Emka Technologies, Paris, France) that was constantly flushed with fresh room air  
384 and previously calibrated by injecting a known volume of air (0.5 ml for mice, 5 ml for rats).  
385 The respiratory flow trace was recorded using a differential pressure transducer (ML141,  
386 ADInstruments, Colorado Springs, CO, USA). The flow of air through the chamber was set  
387 and continuously monitored at 200 ml/min (mice), or 1500 ml/min (rats) using a pump  
388 and gas flow restrictor/monitor (G265, Qubit systems, Kingston, ON, Canada). Inlet and  
389 outlet gases were alternatively subsampled, directed toward a water pressure analyzer  
390 (RH-300, Sable System, Las Vegas, NV), dried and directed to an oxygen/carbon dioxide  
391 analyzer (ML206 Gas analyzer, ADInstruments) for respiratory gases analysis. All signals  
392 were directed toward a PowerLab acquisition interface for analog-to-digital conversion and  
393 storage on a computer running the LabChart software 5 (ADInstruments).

394 Before each experiment, rectal temperature was measured and the animal were weighed,  
395 and equipped with a limb sensor for continuous recordings of pulse oximetry capillary  
396 oxygen saturation ( $SpO_2$ ) and heart rate (MouseSTAT – Kent Scientific, Torrington, CT,  
397 USA). The animal was then placed in the chamber for a period of tranquilization (10 - 15  
398 minutes), and baseline recordings were initiated for 20 min, followed by acute exposure to  
399 32%  $O_2$  – corresponding to the sea level  $PO_2$  – for 10 min. The animal was then exposed to  
400 graded levels of hypoxia (18, 15, 12%  $O_2$  – 10 min each). The mean barometric pressure in  
401 La Paz being around 490 mmHg, these  $O_2\%$  correspond respectively to a partial pressure of  
402 inspired  $O_2$  of 90, 75, and 60 mmHg. At sea level (barometric pressure=760 mmHg), these  
403  $PiO_2$  would be equivalent to 12, 10, and 8%  $O_2$  in inspired air respectively. Rectal  
404 temperature was measured immediately at the end of the last hypoxic exposure. Tidal  
405 volume was calculated from the integrated flow trace as previously described (Lumbroso  
406 and Joseph, 2009; Lumbroso et al., 2012), by using standard equations (Bartlett and  
407 Tenney, 1970). All values were obtained while the animal had a stable breathing pattern  
408 during baseline recordings and within the last 3 minutes of each condition.

409 Oxygen consumption and  $CO_2$  production rates were calculated using the following  
410 equations (Lighton, 2008):

$$411 \quad O_2 \text{ consumption} = \frac{\text{flow} \times \left[ (O_{2in} - O_{2out}) - O_{2out} \times (CO_{2out} - CO_{2in}) \right]}{(1 - O_{2out})}$$

$$412 \quad CO_2 \text{ production} = \text{flow} \times \frac{\left[ (CO_{2out} - CO_{2in}) - CO_{2out} \times (O_{2in} - O_{2out}) \right]}{(1 - CO_{2out})}$$

413 where "flow" is the flow of air measured before entry into the chamber, "O<sub>2in</sub>" and "CO<sub>2in</sub>"  
 414 are the gas fractions in the inflowing air (considered at 20.9% and 0.038%, respectively),  
 415 and "O<sub>2out</sub>" and "CO<sub>2out</sub>" are the gas fractions measured in the outflowing line. The  
 416 respiratory exchange ratio was calculated as CO<sub>2</sub> production / O<sub>2</sub> consumption.

417

#### 418 *Hematological parameters, dissection of hearts and lungs.*

419 A sample of blood was drawn from the tail. The hematocrit was measured by  
 420 microcentrifugation (Micro-MB centrifuge – International Equipment Company, USA) for  
 421 15-20 minutes, and hemoglobin concentration was determined by using the Hemocue field  
 422 spectrophotometer (Agelholm, Sweden). All samples were processed in duplicates for rats,  
 423 and mice if enough blood was obtained.

424 Following blood sampling, animals were anesthetized by an intraperitoneal injection (0.1  
 425 ml/100g of body weight) of ketamine (87.5 mg/ml) and xylazine (12.5 mg/ml) then  
 426 perfused through the left ventricle with ice-cold PBS (pH 7.2) at a constant pressure of 24  
 427 cmH<sub>2</sub>O for the mice and 35 cmH<sub>2</sub>O for the rats. The heart was quickly dissected and  
 428 weighted. The atria are separated from the ventricles. Then the right ventricle (RV) was cut  
 429 off from the left ventricle (LV - left with the cardiac septum - S). We weighted the ventricles  
 430 separately (RV and LV+S) and these values were used to measure the ratio of RV/(LV+S), an  
 431 index of right ventricular hypertrophy and pulmonary hypertension. In 4 males and 4  
 432 females of each species, after cardiac perfusion with PBS, a catheter was fixed in the  
 433 trachea, the lungs were inflated with 4% PFA for 30 minutes at a constant pressure of 24  
 434 cmH<sub>2</sub>O, then dissected. The total volume of the inflated lungs was measured by liquid  
 435 displacement, and they were kept in 4% PFA for 24 hours at room temperature. The next  
 436 day, the lungs were separated into left and right lung (for mice) and 5 lobes (for rats),  
 437 which were dehydrated (1 hours into 65% alcohol solution, then 2 hours in each graded  
 438 alcohol solution - 75%, 85%, 95% and 100%), alcohol was then replaced by xylol (2 baths, 1

439 hour each), and paraffin (2 baths, 1 hour each and a final overnight bath). The samples were  
440 included in paraffin and shipped to Québec city where they were processed to determine  
441 lung histology.

442  
443 *Lung histology.*  
444 Paraffin embedded lungs were cut at 5  $\mu\text{m}$  thick using a microtome (Jung RM2065 Leica  
445 instruments GmbH, Germany). Sections were then mounted on glass slides and dried for  
446 24h in room air. Slices were deparaffinized in toluene baths (2 x 10 min), and re-hydrated  
447 by successive immersions in alcohol 100% (x2), 95%, 70%, 50%, and in water before being  
448 colored with Harris hematoxylin solution (VWR international) for 3 min, rinsed in water for  
449 1 min, exposed in acid-alcohol solution (5 successive immersions in 1% HCl, 70% ethanol),  
450 washed with water for 1 min, dipped in Bluing Reactive RTU (VWR international) and then  
451 in water for 1 min. The slides were mounted in water based mounting medium Liquid  
452 Coverglass SHUR/Mount™ (EMS, Hatfield, PA). The images were captured using a Nikon  
453 eclipse E600 digital imaging system at a magnification of 100 X.

454  
455 *Lung morphology.*  
456 We randomly selected 3 non-overlapping images from each slide using 3 slides per animal  
457 and 8 animals per group (4 males and 4 females). The Mean Linear Intercept (Lm) was  
458 determined by overlapping a grid of 20 horizontal and vertical lines (189  $\mu\text{m}$  each) on each  
459 image and by counting the number of intersections with alveolar walls (Hsia et al., 2010).  
460 When a line crossed a vessel wall rather than an alveolar wall it was counted as 0.5  
461 intersection. Lm was calculated by using the following equation:  $Lm = (N.d)/m$ , with N  
462 being the number of line (20), d the length of each line (189  $\mu\text{m}$ ), and m the number of  
463 intersections with alveolar walls. From Lm values, we calculated the relative alveolar  
464 surface as  $S (\text{m}^2/\text{cm}^3) = 4V/Lm$ , with V being the volume of one image (Hsia et al., 2010). An  
465 estimation of the total alveolar surface was calculated as the product of the relative alveolar  
466 surface and lung volume (measured by water displacement after fixation).

467  
468  
469



470 *Allometric scaling in rats and mice.*

471 To compare physiological and morphological values between control mice and rats we used  
472 allometric scaling, a standard approach to compare animals of different size (Maina et al.,  
473 1989; Stahl, 1967). The allometric scaling variables (b in the equation below) are obtained  
474 by calculating the slope of a regression line fitted through a log-log plot of a parameter (x)  
475 as a function of body weight (M). This allow to obtain an equation of the following form:  
476  $x=aM^b$ . From this equation, we expressed and compared mass-specific variables reported to  
477  $M^b$ . For the respiratory variables we used the scaling variable calculated by Stahl (Stahl,  
478 1967), which are: lung weight and lung volume (b=1), minute ventilation (b=0.8), tidal  
479 volume (b=1.04), respiratory frequency and heart rate (b=-0.25), O<sub>2</sub> consumption and CO<sub>2</sub>  
480 production (b=0.76). For relative and total alveolar surface we respectively used (b=-0.13)  
481 and (b=0.88) as reported for mammals by Maina (Maina et al., 1989). In the text, data  
482 corrected for the allometric scaling variables are referred to as mass-corrected whereas  
483 data compared for body mass are referred to as mass-specific.

484  
485 *Sea level values*

486 Expected sea level values for a selected series of variables are presented in Table 1. These  
487 values were either selected from the literature or have been obtained from our colony of  
488 sea level sprague-dawley rats and FVB mice (unpublished results). Values of lung  
489 morphology have been obtained by using the approach described above. These values are  
490 mostly informative, and we have not made statistical analysis to compare high altitude vs.  
491 sea level values.

492  
493 *Statistical analysis*

494 We used GraphPad Prism 6.0c (for 2-way ANOVA and post-hoc analysis) and JMP 11.0 (for  
495 2-way-ANOVA with repeated measures) for statistical analysis. All values are reported as  
496 mean  $\pm$  s.e.m., and the significant P value was set a 0.05.

497 For the hematocrit, right ventricular hypertrophy, and lung morphology data, we first  
498 performed 2-way ANOVAs with species and sex as grouping variables. When significant  
499 effects, or a significant interaction between species and sex appeared, a post-hoc analysis  
500 was performed (Fisher's LSD).

501 For variables measured at different levels of  $PiO_2$  we used a MANOVA model (in JMP) with  
502 species and sex as grouping variables and  $PiO_2$  as the repeated term. When no significant  
503 effect of sex, significant interactions between sex and species, or sex and  $PiO_2$  appeared for  
504 these values, data from males and females were pooled. When significant species effects  
505 appeared, a post-hoc analysis was performed for each  $PiO_2$  level (Fisher's LSD) to  
506 determine the effects of species, or for each group to determine the effects of  $PiO_2$  level. P  
507 values are reported in the figures with the following general pattern: \*, \*\*, \*\*\*, and \*\*\*\* are  
508 used to report  $P < 0.05$ , 0.01, 0.001, and 0.0001, respectively.

509  
510 **Acknowledgements:** The authors acknowledge Carlos Salinas [Director, Bolivian Institute  
511 for Altitude Biology (IBBA)] for effective help in Bolivia. The authors acknowledge Dr. J.  
512 Soliz for careful reading of the manuscript and fruitful discussions.

513  
514 **Funding:** Study funded by the Natural Sciences and Engineering Research Council of  
515 Canada (grant # RGP GP-2009-26139 and RGP GP-2014-00083). AJL is supported by a  
516 training grant in respiratory physiology from Réseau en Santé Respiratoire (Fonds de  
517 Recherche du Québec – Santé, and Canadian Institute for Health Research).

518  
519 **Authors contribution:** VJ, MG and AJL developed the concepts and designed the  
520 experiments. AJL, GV, MG and IV performed the experiments. AJL and VJ analyzed the data  
521 and prepared the figures. VJ and AJL prepared or edited the manuscript prior to submission.

522

|                                                                               | Rats            |               | Mice            |               |
|-------------------------------------------------------------------------------|-----------------|---------------|-----------------|---------------|
|                                                                               | Sea level       | High altitude | Sea level       | High altitude |
| <i>Body weight (g)</i>                                                        | 333±21          | 232±9         | 27.3±0.8        | 13.7±0.9      |
| <i>Rectal temp. (°C)</i>                                                      | 36.8±0.2        | 35.2±0.2      | 35.6±0.3        | 35.2±0.2      |
| <i>Hematocrit (%)</i>                                                         | 41.2 - 47.3 (a) | 60.5±1.1      | 39.0 - 42.5 (b) | 47.0±1.7      |
| <i>Hemoglobin (g/ml)</i>                                                      | 14.4 - 16.0 (a) | 20.4±0.3      | 14.3 - 15.2 (b) | 11.6±1        |
| <i>RV/(LV+S) (%)</i>                                                          | 27.9±0.6 (c)    | 59.7±5.6      | ~20 (d)         | 32.0±2.0      |
| <i>Heart rate (bpm)</i>                                                       | 250 - 400 (e)   | 503±4         | 500 - 700 (f)   | 669±23        |
| <i>Lung volume (ml/g)x10<sup>2</sup></i>                                      | 2.4±0.2         | 2.6±0.1       | 2.7±0.2         | 7.6±0.4       |
| <i>Lung weight (g/g)x10<sup>2</sup></i>                                       | 0.29±0.01       | 0.44±0.02     | 0.49±0.01       | 1.06±0.05     |
| <i>Total alv. surface (m<sup>2</sup>/g<sup>0.88</sup>)x10<sup>2</sup></i>     | 0.99±0.05       | 0.87±0.04     | 1.04±0.13       | 3.41±0.34     |
| <i>O<sub>2</sub> consumption (ml/min/g<sup>0.76</sup>)</i>                    | 0.144±0.003     | 0.064±0.001   | 0.149±0.01      | 0.109±0.006   |
| <i>Total alv. surface to O<sub>2</sub> consumption (m<sup>2</sup>/ml/min)</i> | ~0.10           | 0.30±0.03     | ~0.11           | 0.47±0.05     |

523

524 Table 1: Comparison between values obtained at sea level and high altitude in adult (3  
525 months old) male rats or mice for selected variables. Values are ranges (min – max) or  
526 mean ± SEM. All high altitude values are those obtained in the present study. Sea level  
527 values are unpublished data from our colony of SD rats and FVB mice or are from the  
528 following references: (a): (Sharp and La Regina). (b)  
529 [http://www.informatics.jax.org/mgihome/other/mouse\\_facts1.shtml](http://www.informatics.jax.org/mgihome/other/mouse_facts1.shtml), (c) (Lumbroso and  
530 Joseph, 2009), (d) (Ciuculan et al., 2011), (e) (Giknis and Clifford, 2006), (f) (Sebastian et al.,  
531 2013).

532

## REFERENCES

- (2005). *Mammal Species of the World: A Taxonomic and Geographic Reference* (3rd ed): Johns Hopkins University Press.  
<http://www.departments.bucknell.edu/biology/resources/msw3/>
- Anderson, S.** (1997). Mammals of Bolivia: Taxonomy and distribution.
- Barros, R. C., Zimmer, M. E., Branco, L. G. and Milsom, W. K.** (2001). Hypoxic metabolic response of the golden-mantled ground squirrel. *J Appl Physiol* (1985) **91**, 603-12.
- Bartlett, D., Jr. and Tenney, S. M.** (1970). Control of breathing in experimental anemia. *Respir Physiol* **10**, 384-95.
- Bickler, P. E. and Buck, L. T.** (2007). Hypoxia tolerance in reptiles, amphibians, and fishes: life with variable oxygen availability. *Annu Rev Physiol* **69**, 145-70.
- Cheviron, Z. A., Bachman, G. C., Connaty, A. D., McClelland, G. B. and Storz, J. F.** (2012). Regulatory changes contribute to the adaptive enhancement of thermogenic capacity in high-altitude deer mice. *Proc Natl Acad Sci U S A* **109**, 8635-40.
- Ciucan, L., Bonneau, O., Hussey, M., Duggan, N., Holmes, A. M., Good, R., Stringer, R., Jones, P., Morrell, N. W., Jarai, G. et al.** (2011). A novel murine model of severe pulmonary arterial hypertension. *Am J Respir Crit Care Med* **184**, 1171-82.
- Dempsey, J. A., Powell, F. L., Bisgard, G. E., Blain, G. M., Poulin, M. J. and Smith, C. A.** (2014). Role of chemoreception in cardiorespiratory acclimatization to, and deacclimatization from, hypoxia. *J Appl Physiol* (1985) **116**, 858-66.
- Donnelly, S.** (2001). Why is erythropoietin made in the kidney? The kidney functions as a critmeter. *Am J Kidney Dis* **38**, 415-25.
- Franke, K., Gassmann, M. and Wielockx, B.** (2013). Erythrocytosis: the HIF pathway in control. *Blood* **122**, 1122-8.
- Garland, T., Jr. and Adolph, S. C.** (1994). Why not to do two-species comparative studies: limitations on inferring adaptation. *Physiological Zoology* **67**, 797-828.
- Giknis, M. and Clifford, C.** (2006). Clinical laboratory parameters for Crl: CD (SD) rats. *Charles River Laboratories*, 1-14.

- 562           **Hochachka, P. W. and Somero, G. N.** (2002). Cellular mechanism, regulation, and  
563 homeostasis. In *Process in Physiological Evolution.*, pp. 20-100. Oxford, Uk.: Oxford  
564 University Press.
- 565           **Hsia, C. C., Hyde, D. M., Ochs, M., Weibel, E. R. and Structure, A. E. J. T. F. o. Q. A. o.**  
566 **L.** (2010). An official research policy statement of the American Thoracic Society/European  
567 Respiratory Society: standards for quantitative assessment of lung structure. *Am J Respir*  
568 *Crit Care Med* **181**, 394-418.
- 569           **Innes, J. G.** (2005). Norway Rat - Ship Rat. In *The handbook of New Zealand*  
570 *mammals*, (ed. C. M. King), pp. 174-203. Melbourne: Oxford University Press.
- 571           **Joseph, V. and Pequignot, J. M.** (2009). Breathing at high altitude. *Cell Mol Life Sci*  
572 **66**, 3565-73.
- 573           **Joseph, V., Soliz, J., Soria, R., Pequignot, J., Favier, R., Spielvogel, H. and**  
574 **Pequignot, J. M.** (2002). Dopaminergic metabolism in carotid bodies and high altitude  
575 acclimatization in female rats. *Am J Physiol* **282**, R765-R773.
- 576           **Kline, D. D., Peng, Y. J., Manalo, D. J., Semenza, G. L. and Prabhakar, N. R.** (2002).  
577 Defective carotid body function and impaired ventilatory responses to chronic hypoxia in  
578 mice partially deficient for hypoxia-inducible factor 1 alpha. *Proc Natl Acad Sci U S A* **99**,  
579 821-6.
- 580           **Lemmer, B., Mattes, A., Bohm, M. and Ganten, D.** (1993). Circadian blood pressure  
581 variation in transgenic hypertensive rats. *Hypertension* **22**, 97-101.
- 582           **Lighton, J. R. B.** (2008). Flow-through respirometry using incurrent flow  
583 measurements. In *Measuring Metabolic Rate: A manual for scientists*, pp. 105-131. New York:  
584 Oxford University Press; Inc.
- 585           **Lumbroso, D. and Joseph, V.** (2009). Impaired acclimatization to chronic hypoxia in  
586 adult male and female rats following neonatal hypoxia. *Am J Physiol Regul Integr Comp*  
587 *Physiol* **297**, R421-7.
- 588           **Lumbroso, D., Lemoine, A., Gonzales, M., Villalpando, G., Seaborn, T. and Joseph,**  
589 **V.** (2012). Life-long consequences of postnatal normoxia exposure in rats raised at high  
590 altitude. *J Appl Physiol* **112**, 33-41.

591 **Maina, J. N., King, A. S. and Settle, G.** (1989). An allometric study of pulmonary  
592 morphometric parameters in birds, with mammalian comparisons. *Philos Trans R Soc Lond*  
593 *B Biol Sci* **326**, 1-57.

594 **Monge, C. and Leon-Velarde, F.** (1991). Physiological adaptation to high altitude:  
595 oxygen transport in mammals and birds. *Physiol Rev* **71**, 1135-72.

596 **Mukundan, H., Resta, T. C. and Kanagy, N. L.** (2002). 17Beta-estradiol decreases  
597 hypoxic induction of erythropoietin gene expression. *Am J Physiol Regul Integr Comp Physiol*  
598 **283**, R496-504.

599 **Naeije, R. and Manes, A.** (2014). The right ventricle in pulmonary arterial  
600 hypertension. *Eur Respir Rev* **23**, 476-87.

601 **Nathaniel, T. I., Otukonyong, E., Abdellatif, A. and Soyinka, J. O.** (2012). Effect of  
602 hypoxia on metabolic rate, core body temperature, and c-fos expression in the naked mole  
603 rat. *Int J Dev Neurosci* **30**, 539-44.

604 **Olsen, N. V., Aachmann-Andersen, N. J., Oturai, P., Munch-Andersen, T., Borno,**  
605 **A., Hulston, C., Holstein-Rathlou, N. H., Robach, P. and Lundby, C.** (2011). Erythropoietin  
606 down-regulates proximal renal tubular reabsorption and causes a fall in glomerular  
607 filtration rate in humans. *J Physiol* **589**, 1273-81.

608 **Pascual, O., Denavit-Saubie, M., Dumas, S., Kietzmann, T., Ghilini, G., Mallet, J.**  
609 **and Pequignot, J. M.** (2001). Selective cardiorespiratory and catecholaminergic areas  
610 express the hypoxia-inducible factor-1alpha (HIF-1alpha) under in vivo hypoxia in rat  
611 brainstem. *Eur J Neurosci* **14**, 1981-91.

612 **Pichon, A., Zhenzhong, B., Marchant, D., Jin, G., Voituron, N., Haixia, Y., Favret, F.,**  
613 **Richalet, J. P. and Ge, R. L.** (2013). Cardiac adaptation to high altitude in the plateau pika  
614 (*Ochotona curzoniae*). *Physiol Rep* **1**, e00032.

615 **Powell, F. L. and Fu, Z.** (2008). HIF-1 and ventilatory acclimatization to chronic  
616 hypoxia. *Respir Physiol Neurobiol* **164**, 282-7.

617 **Prabhakar, N. R. and Semenza, G. L.** (2012). Adaptive and maladaptive  
618 cardiorespiratory responses to continuous and intermittent hypoxia mediated by hypoxia-  
619 inducible factors 1 and 2. *Physiol Rev* **92**, 967-1003.

620 **Qi, X. Z., Wang, X. J., Zhu, S. H., Rao, X. F., Wei, L. and Wei, D. B.** (2008). [Hypoxic  
621 adaptation of the hearts of plateau zokor (*Myospalax baileyi*) and plateau pika (*Ochotona*  
622 *curzoniae*)]. *Sheng Li Xue Bao* **60**, 348-54.

623 **Sebastian, S., Ang, R., Abramowitz, J., Weinstein, L. S., Chen, M., Ludwig, A.,**  
624 **Birnbaumer, L. and Tinker, A.** (2013). The in vivo regulation of heart rate in the murine  
625 sinoatrial node by stimulatory and inhibitory heterotrimeric G proteins. *Am J Physiol Regul*  
626 *Integr Comp Physiol* **305**, R435-42.

627 **Sharp, P. and La Regina, M.** The laboratory rat. 1998: CRC Press, Boca Raton, FL.

628 **Soliz, J., Gassmann, M. and Joseph, V.** (2007). Soluble erythropoietin receptor is  
629 present in the mouse brain and is required for the ventilatory acclimatization to hypoxia. *J*  
630 *Physiol* **583**, 329-36.

631 **Stahl, W. R.** (1967). Scaling of respiratory variables in mammals. *J Appl Physiol* **22**,  
632 453-60.

633 **Steiner, A. A., Rocha, M. J. and Branco, L. G.** (2002). A neurochemical mechanism  
634 for hypoxia-induced anapnoea. *Am J Physiol Regul Integr Comp Physiol* **283**, R1412-22.

635 **Storz, J. F., Baze, M., Waite, J. L., Hoffmann, F. G., Opazo, J. C. and Hayes, J. P.**  
636 (2007). Complex signatures of selection and gene conversion in the duplicated globin genes  
637 of house mice. *Genetics* **177**, 481-500.

638 **Storz, J. F., Runck, A. M., Moriyama, H., Weber, R. E. and Fago, A.** (2010a). Genetic  
639 differences in hemoglobin function between highland and lowland deer mice. *J Exp Biol*  
640 **213**, 2565-74.

641 **Storz, J. F., Runck, A. M., Sabatino, S. J., Kelly, J. K., Ferrand, N., Moriyama, H.,**  
642 **Weber, R. E. and Fago, A.** (2009). Evolutionary and functional insights into the mechanism  
643 underlying high-altitude adaptation of deer mouse hemoglobin. *Proc Natl Acad Sci U S A*  
644 **106**, 14450-5.

645 **Storz, J. F., Scott, G. R. and Cheviron, Z. A.** (2010b). Phenotypic plasticity and  
646 genetic adaptation to high-altitude hypoxia in vertebrates. *J Exp Biol* **213**, 4125-36.

647 **Tenney, S. M. and Remmers, J. E.** (1963). Comparative quantitative morphology of  
648 the mammalian lung: diffusing area. *Nature* **197**, 54-6.

649 **Tucker, A. and Rhodes, J.** (2001). Role of vascular smooth muscle in the  
650 development of high altitude pulmonary hypertension: an interspecies evaluation. *High Alt*  
651 *Med Biol* **2**, 173-89.

652 **Wilmshurst, J. M., Anderson, A. J., Higham, T. F. and Worthy, T. H.** (2008). Dating  
653 the late prehistoric dispersal of Polynesians to New Zealand using the commensal Pacific  
654 rat. *Proc Natl Acad Sci U S A* **105**, 7676-80.

655 **Yang, H., Wang, J. R., Didion, J. P., Buus, R. J., Bell, T. A., Welsh, C. E., Bonhomme,**  
656 **F., Yu, A. H., Nachman, M. W., Pialek, J. et al.** (2011). Subspecific origin and haplotype  
657 diversity in the laboratory mouse. *Nat Genet* **43**, 648-55.

658

659



660 **FIGURE LEGEND**

661  
 662 **Figure 1. Hematological variables, right ventricular hypertrophy, heart rate and**  
 663 **arterial saturation in high altitude rats and mice.** (A) arterial saturation ( $SpO_2$  – %), (B)  
 664 right-to-left ventricle ratio (%), (C) heart rate (bpm), (D) mass-corrected heart rate (bpm/g<sup>-0,25</sup>), (E) hematocrit (Hct – %), and (F) hemoglobin (Hb – g/dl), in 2 months old males and  
 666 females rats and mice living at high altitude for 30 generations. Values are  $\pm$  s.e.m.

667 \*\*\*\*:  $P < 0.0001$  mice vs. rats.

668 °, °°°°:  $P < 0.05$  and  $< 0.0001$  females vs. males.

669  
 670 **Figure 2. Ventilatory variables under baseline condition (21% oxygen) in high**  
 671 **altitude rats and mice.** (A, D) minute ventilation ( $\dot{V}_E$  – ml/min/100g and ml/min/g<sup>0,8</sup>), (B,  
 672 E) tidal volume ( $V_T$  – ml/100g and ml/g<sup>1,04</sup>), (C, F) respiratory frequency (fR – breaths/min  
 673 and breaths/min/g<sup>-0,25</sup>), in 2 months old rats and mice. (A, B) are mass-specific values, and  
 674 (D, E, F) are mass-corrected values. Values are  $\pm$  s.e.m.

675 \*, \*\*, \*\*\*, \*\*\*\*:  $P < 0.05$ ,  $< 0.01$ ,  $< 0.001$  and  $< 0.0001$  mice vs. rats.

676 °, °°:  $P < 0.05$  and  $< 0.01$  females vs. males.

677  
 678 **Figure 3. Metabolic variables under baseline condition (21% oxygen) in high altitude**  
 679 **rats and mice.** (A, C)  $O_2$  consumption ( $\dot{V}_{O_2}$  – ml/min/100g and ml/min/g<sup>0,76</sup>), (B, D)  $CO_2$   
 680 production rate ( $\dot{V}_{CO_2}$  – ml/min/100g and ml/min/g<sup>0,76</sup>) in 2 months old rats and mice. (A,  
 681 B) are mass-specific values, and (C, D) are mass-corrected values. (E) Respiratory exchange  
 682 ratio ( $\dot{V}_{CO_2} / \dot{V}_{O_2}$ ). Values are  $\pm$  s.e.m.

683 \*, \*\*, \*\*\*, \*\*\*\*:  $P < 0.05$ ,  $< 0.01$ ,  $< 0.001$  and  $< 0.0001$  mice vs. rats.

684  
 685 **Figure 4. Variables of lung morphology in high altitude rats and mice.** (A) mass-  
 686 specific lung volume (ml/g), and (B) mass-specific lung weight (g/g) in 2 months old rats  
 687 and mice. Values are  $\pm$  s.e.m.

688 \*\*, \*\*\*\*:  $P < 0.05$ , and  $< 0.0001$  mice vs. rats.

689 °:  $P < 0.05$  females vs. males.

690  
 691 **Figure 5. Variables of lung architecture in high altitude rats and mice.** Typical image of  
 692 the architectural lungs obtained for rats (A) and mice (B). (C) mean linear intercept ( $L_m -$   
 693  $\mu\text{m}$ ), (D) mass-corrected relative alveolar surface ( $\text{m}^2/\text{cm}^3/\text{g}^{0.13}$ ), (E) mass-corrected total  
 694 alveolar surface ( $\text{m}^2/\text{g}^{0.88}$ ) in 2 months old rats and mice. Values are  $\pm$  s.e.m.

695 Scale bars on A and B =  $50 \mu\text{m}$

696 \*, \*\*\*, \*\*\*\*:  $P < 0.05$ ,  $< 0.001$  and  $< 0.0001$  mice vs. rats.

697  
 698 **Figure 6. Total alveolar surface to  $\text{O}_2$  consumption ( $\text{m}^2/\text{ml}/\text{min}$ ) in high altitude rats**  
 699 **and mice.** Values are  $\pm$  s.e.m.

700 \*\*:  $P < 0.01$  mice vs. rats.

701  
 702 **Figure 7. Response to changes of inspired  $\text{O}_2$  in high altitude rats and mice.** (A)  
 703 Arterial oxygen saturation ( $\text{SpO}_2 - \%$ ), (B) heart rate ( $\%$  vs. baseline) in 2 months old rats  
 704 and mice. Values are  $\pm$  s.e.m.

705 \*, \*\*, \*\*\*,  $P < 0.05$ ,  $< 0.01$  and  $< 0.001$  mice vs. rats.

706 †, ††:  $P < 0.05$  and  $< 0.01$  vs. baseline ( $21\% \text{O}_2$ ).

707  
 708 **Figure 8. Response to changes of inspired  $\text{O}_2$  in high altitude rats and mice.** (A) minute  
 709 ventilation, (B) tidal volume, and (C) respiratory frequency (all as  $\%$  vs. baseline) in 2  
 710 months old rats and mice. Values are  $\pm$  s.e.m.

711 \*, \*\*\*, \*\*\*\*:  $P < 0.05$ ,  $< 0.001$  and  $< 0.0001$  mice vs. rats.

712 ††, ††††:  $P < 0.01$  and  $< 0.0001$  vs. baseline ( $21\% \text{O}_2$ ).

713  
 714 **Figure 9. Response to changes of inspired  $\text{O}_2$  in high altitude rats and mice.** (A)  $\text{O}_2$   
 715 consumption ( $\dot{V}_{\text{O}_2} - \%$  vs. baseline), (B)  $\text{CO}_2$  production rate ( $\dot{V}_{\text{CO}_2} - \%$  vs. baseline), and (C)  
 716 rectal temperature ( $^\circ\text{C}$ ) in 2 months old rats and mice. Values are  $\pm$  s.e.m.

717 \*\*, \*\*\*, \*\*\*\*:  $P < 0.01$ ,  $< 0.001$  and  $< 0.0001$  mice vs. rats.

718 ††, ††††:  $P < 0.01$  and  $< 0.0001$  vs. baseline ( $21\% \text{O}_2$ ).

719  
720 **Figure 10. Responses to changes of inspired O<sub>2</sub> in high altitude rats and mice.** (A-B) %  
721 O<sub>2</sub> extraction, (C-D) minute ventilation, (E-F) mass-specific O<sub>2</sub> consumption rate ( $\dot{V}_{O_2}$  –  
722 ml/min/100g) in 2 months old, male and female rats and mice. Values are  $\pm$  s.e.m.  
723 <sup>oooo</sup>: P<0.05 and <0.0001 female vs. male.  
724 \*, \*\*\*, \*\*\*\*: P<0.05, <0.001, and 0.0001 mice vs rats.  
725 †, ††††: P<0.05, and <0.0001 vs. baseline (21% O<sub>2</sub>) – in A †: P<0.05 vs. 32% O<sub>2</sub>.

726

727

728

729

730

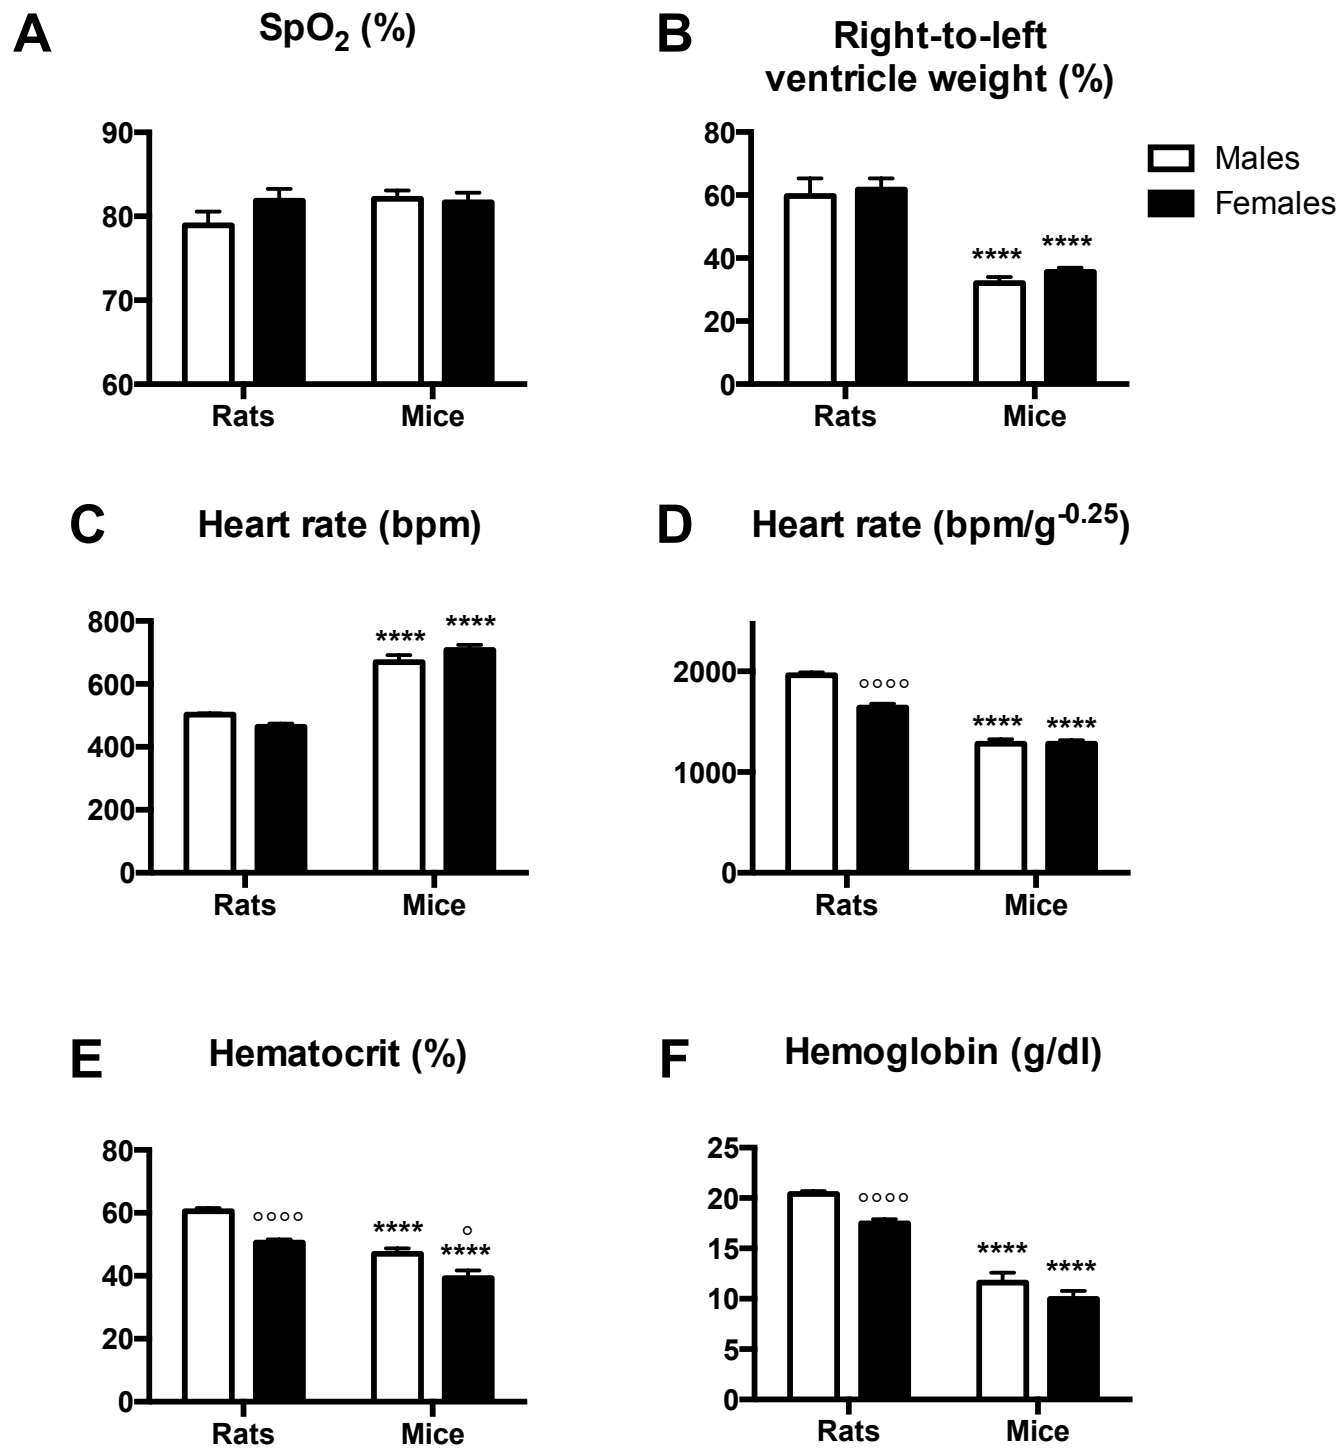

**Figure 1**

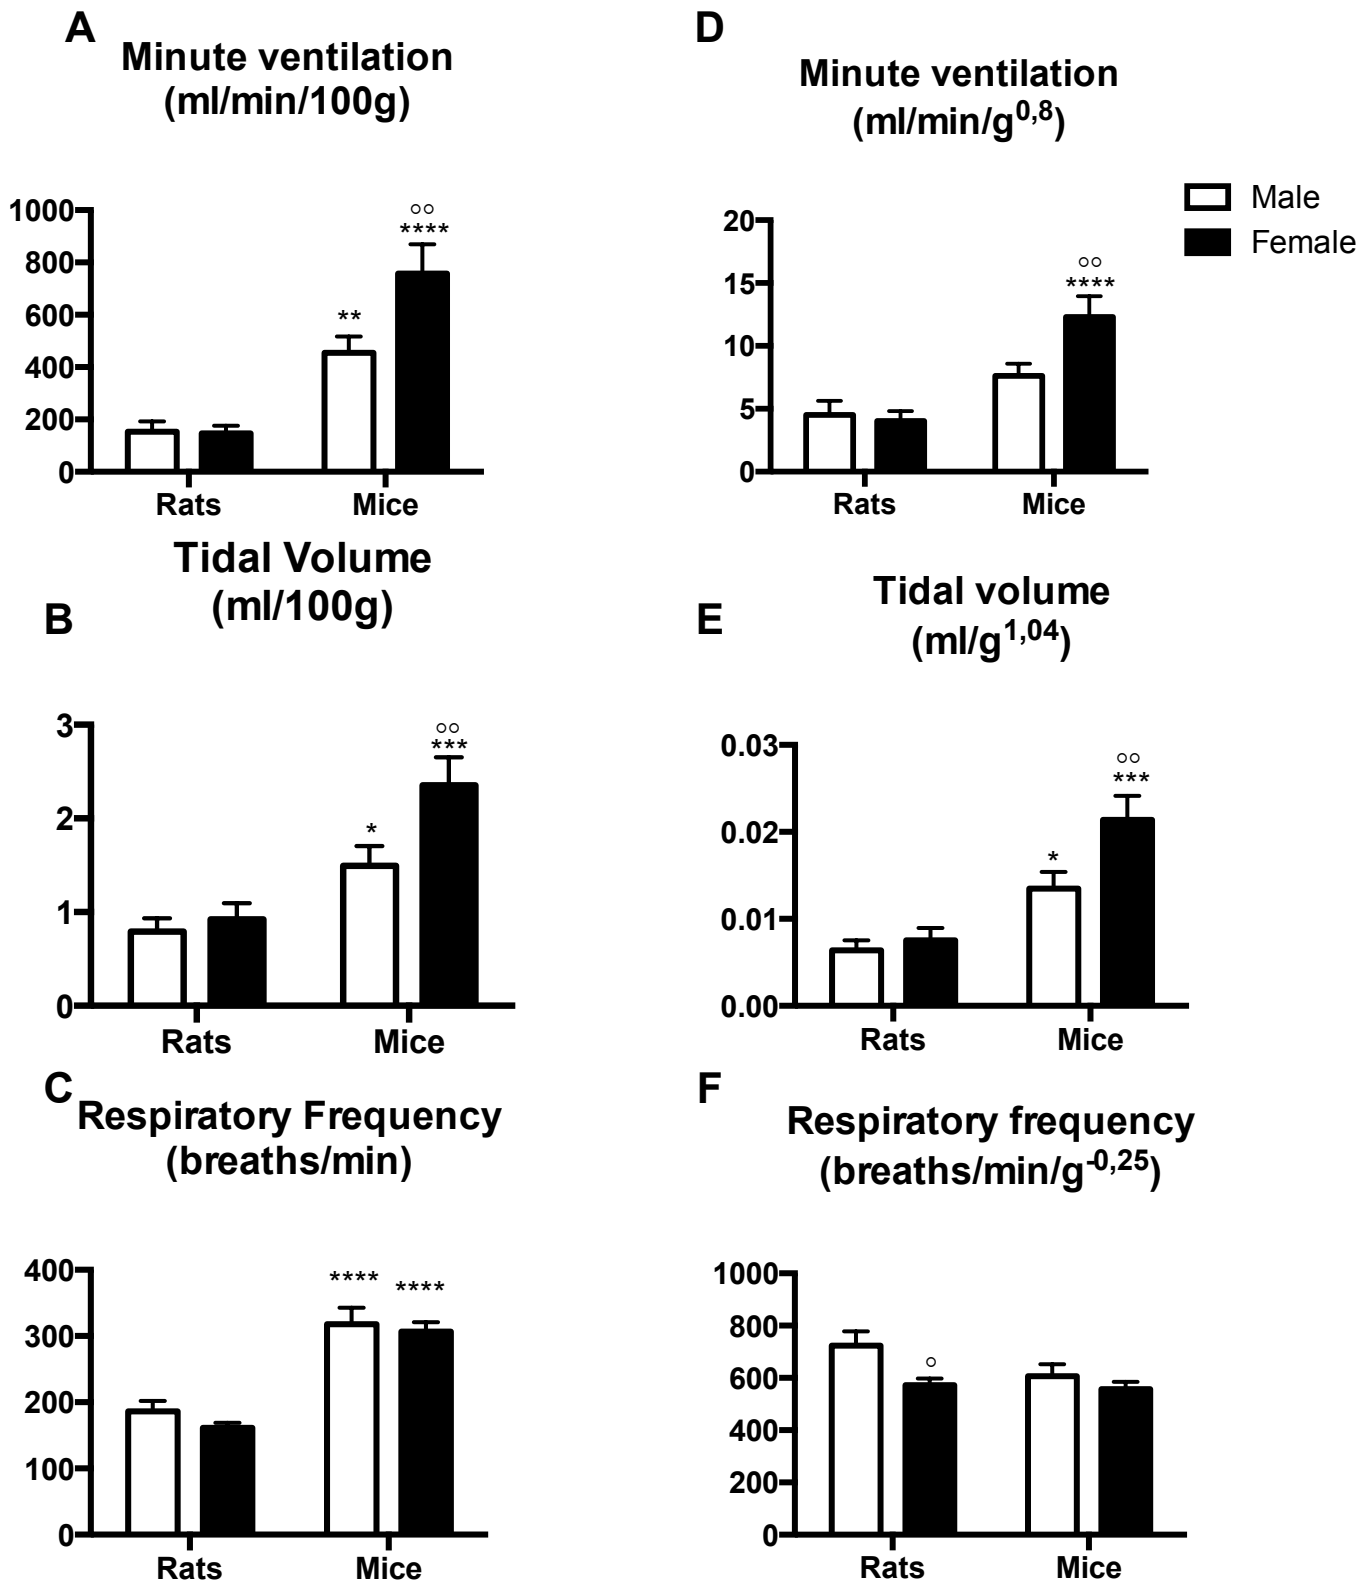

**Figure 2**

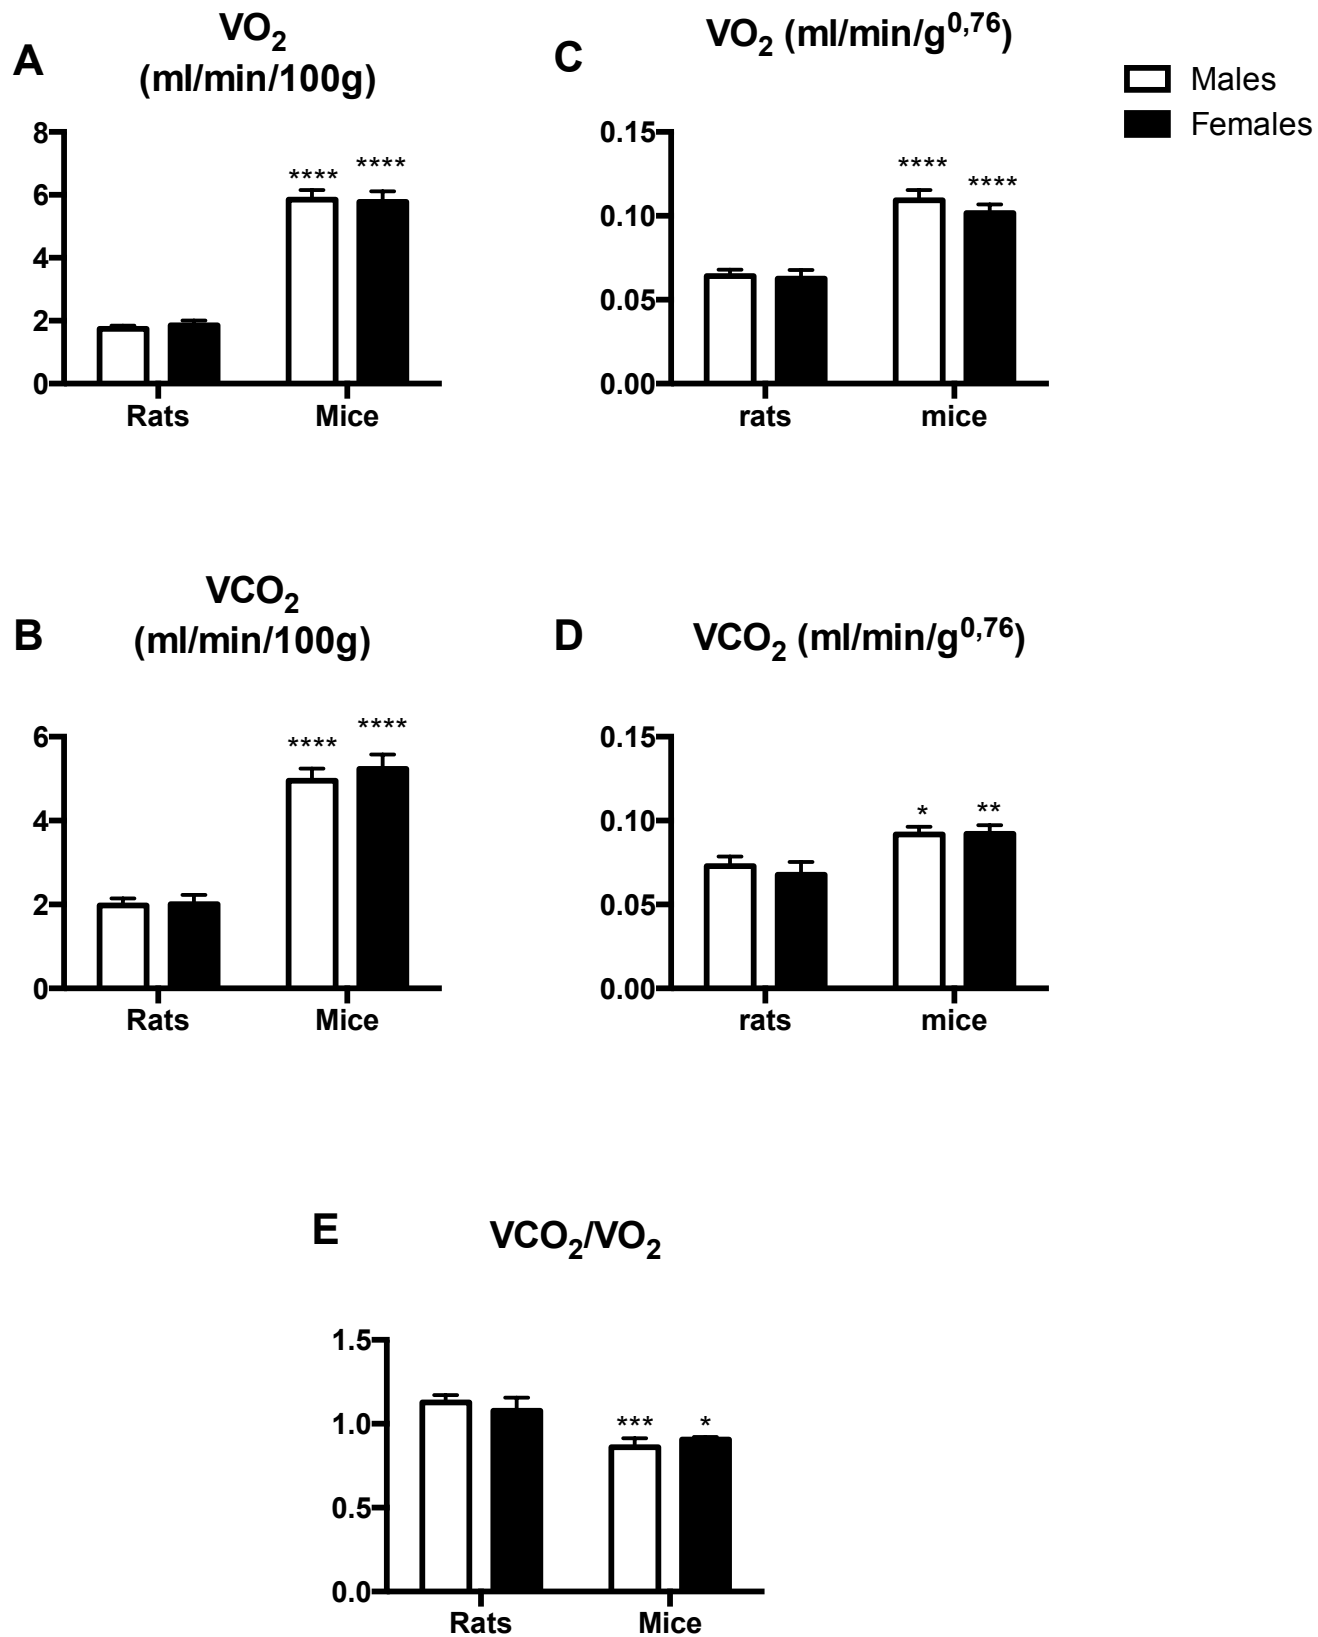

**Figure 3**

**A** Lung volume (ml/g)

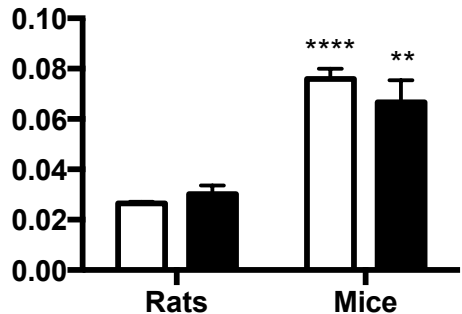

**B** Lung weight (g/g)

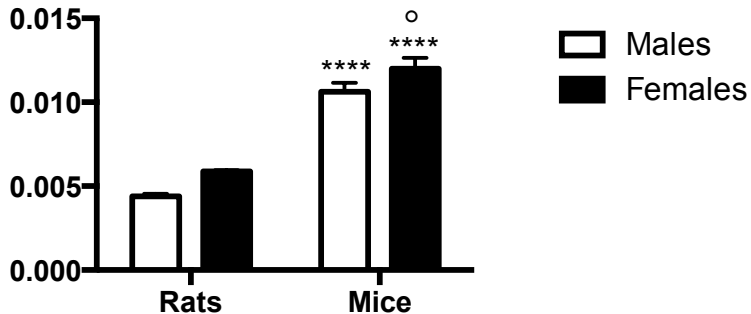

Figure 4

**A**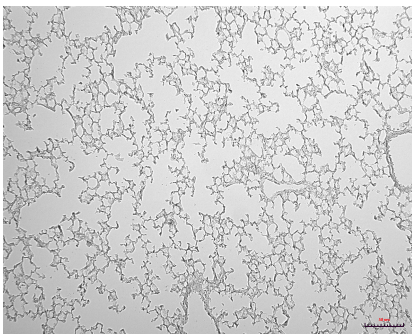**B**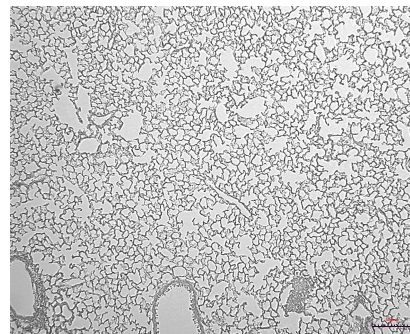**C****Lm - ( $\mu\text{m}$ )**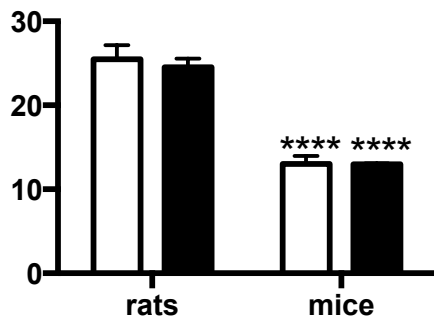**D****Relative alveolar surface ( $\text{m}^2/\text{cm}^3/\text{g}^{-0.13}$ )**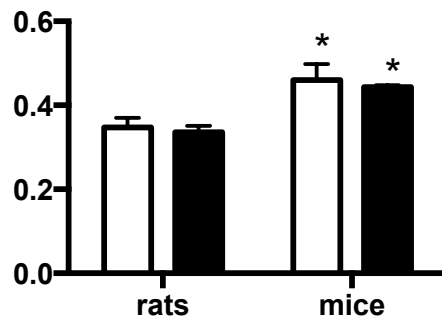**E****Total alveolar surface ( $\text{m}^2/\text{g}^{0.88}$ )**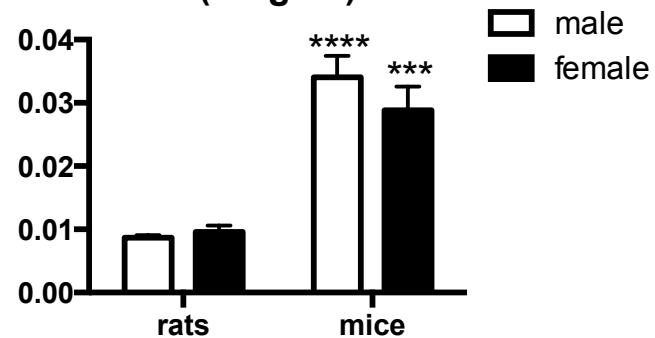**Figure 5**



Total alveolar surface / O<sub>2</sub> consumption  
(m<sup>2</sup>/ml.min<sup>-1</sup>)

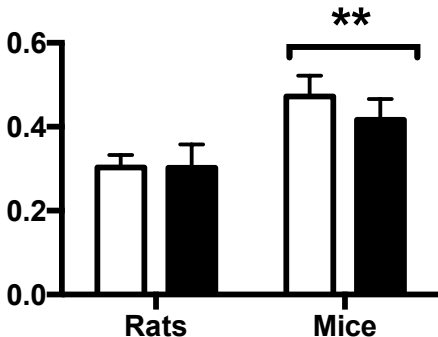

Figure 6

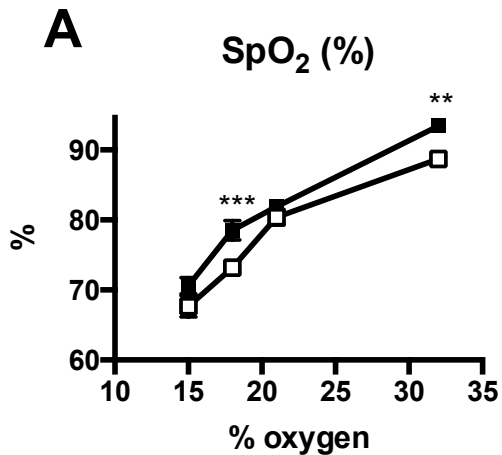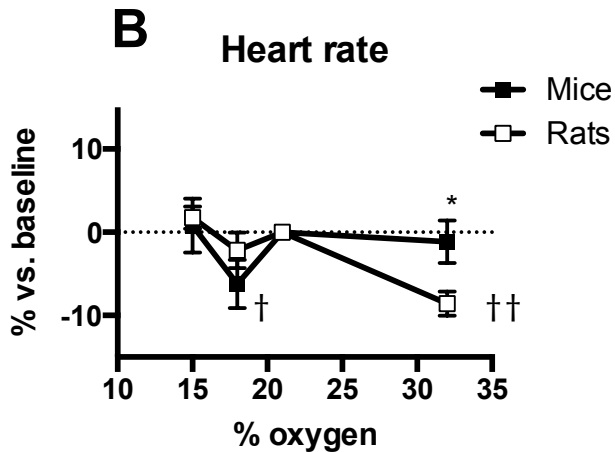

\* mice vs rats

° vs. 21% O<sub>2</sub>

Figure 7

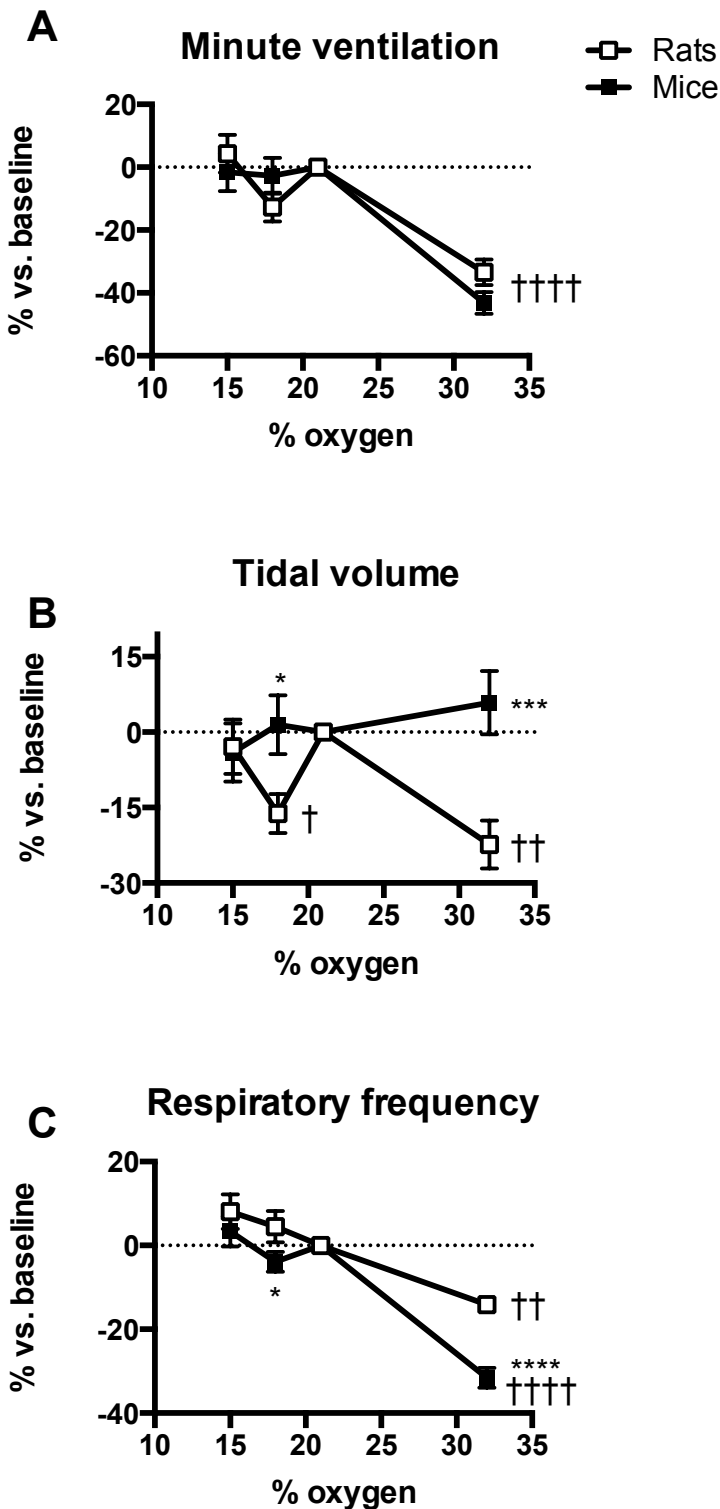

**Figure 8**

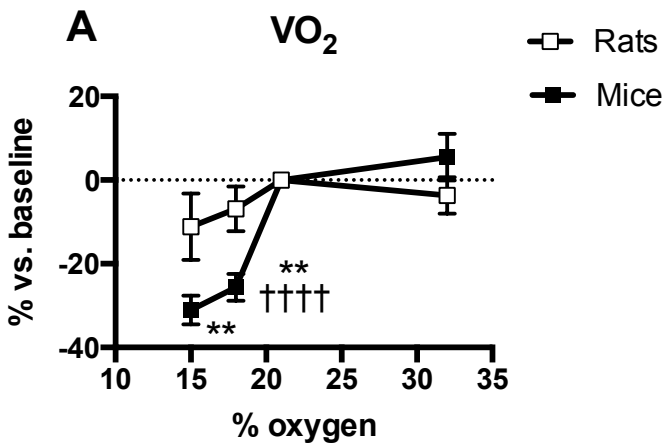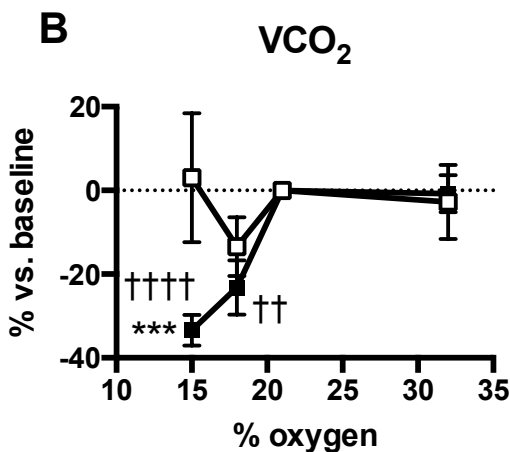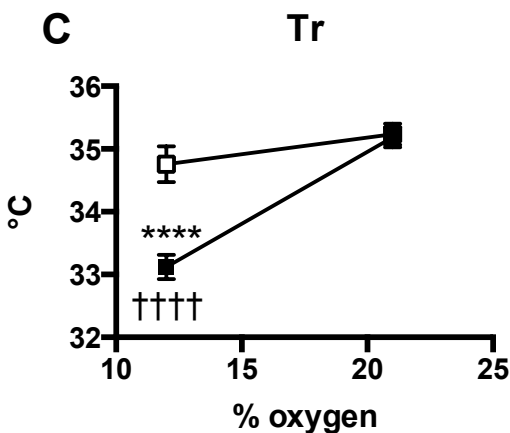

**Figure 9**

# Males

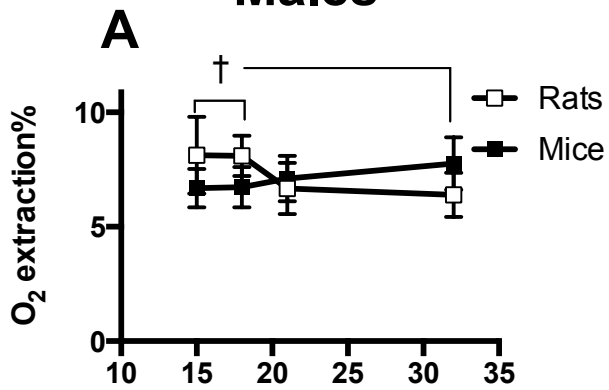

# Females

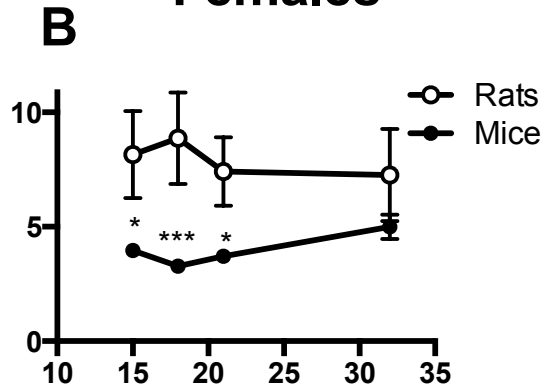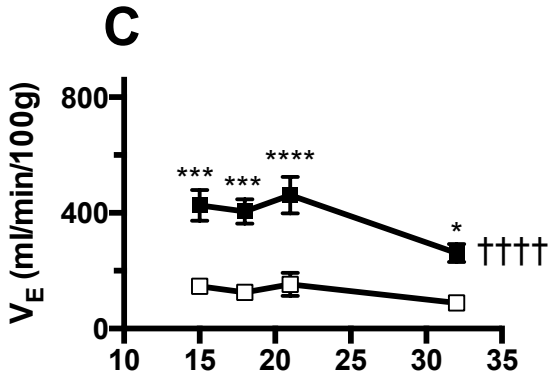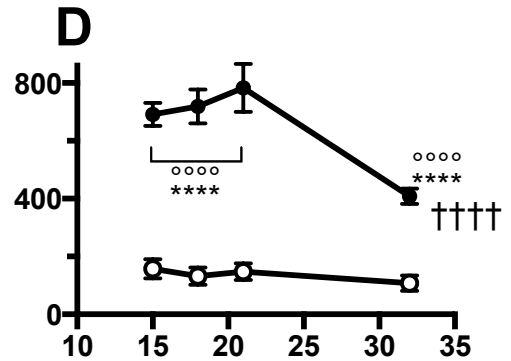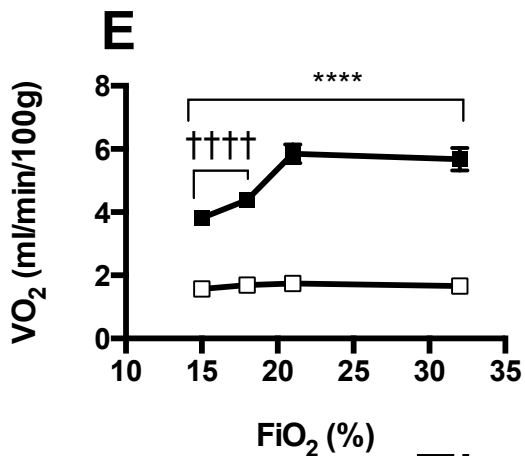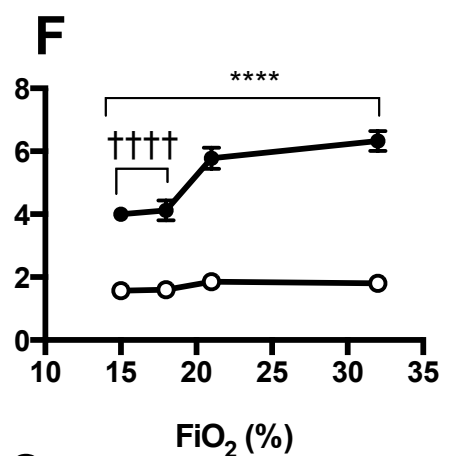

Figure 10
